# Supplementary material
Source: PubMed Central journal article supplement (PMC3842866)
Supplement: Supp_Table1.pdf [file Supp_Table1.pdf]

## Supplementary Data

SUPPLEMENTARY TABLE S1. DEMOGRAPHICS

|                                        | <i>Acute phase</i>   |                     | <i>Extension phase<br/>ATX (n = 155)</i> |
|----------------------------------------|----------------------|---------------------|------------------------------------------|
|                                        | <i>ATX (n = 120)</i> | <i>PLB (n = 89)</i> |                                          |
| Age (years), mean (range)              | 12.2 (10.0–16.8)     | 12.4 (10.1–17.0)    | 12.3 (10.0–17.0)                         |
| Gender (male), <i>n (%)</i>            | 74 (61.7)            | 55 (61.8)           | 91 (58.7)                                |
| Ethnicity, <i>n (%)</i>                |                      |                     |                                          |
| African American                       | 13 (10.8)            | 11 (12.4)           | 11 (7.1)                                 |
| White                                  | 86 (71.7)            | 66 (74.2)           | 121 (78.1)                               |
| Eastern Asian                          | 2 (1.7)              | 1 (1.1)             | 3 (1.9)                                  |
| Hispanic                               | 18 (15.0)            | 11 (12.4)           | 19 (12.3)                                |
| West Asian                             | 1 (0.8)              | 0                   | 1 (0.6)                                  |
| ADHD subtype, <i>n (%)</i>             |                      |                     |                                          |
| Hyperactive/impulsive                  | 2 (2.0)              | 2 (3.0)             | 3 (2.3)                                  |
| Inattentive                            | 49 (49.5)            | 36 (53.7)           | 65 (50.8)                                |
| Combined                               | 48 (48.5)            | 29 (43.3)           | 60 (46.9)                                |
| Prior stimulant exposure, <i>n (%)</i> | 42 (35.0)            | 23 (25.8)           | 43 (27.7)                                |
| ADHD-only, <i>n (%)</i>                | 27 (22.5)            | 0                   | 21 (13.5)                                |
| Dyslexia-only, <i>n (%)</i>            | 29 (24.2)            | 29 (32.6)           | 38 (24.5)                                |
| ADHD+D, <i>n (%)</i>                   | 64 (53.3)            | 60 (67.4)           | 96 (61.9)                                |

ADHD, attention-deficit/hyperactivity disorder; ADHD+D, attention-deficit/hyperactivity disorder+dyslexia; ATX, atomoxetine; PLB, placebo.
