# Supplementary material
Source: PubMed Central journal article supplement (PMC3842866)
Supplement: Supp_Table2.pdf [file Supp_Table2.pdf]

SUPPLEMENTARY TABLE S2. ACUTE PHASE: ADHDRS-IV-PARENT:INV, ADHDRS-IV-TEACHER VERSION, AND LIFE PARTICIPATION SCALE

| Measure                                                    | T <sub>x</sub> | ADHD + D |          |                                   |                | Dyslexia-only |          |                                   |                | ADHD-only |          |                      |                |                |
|------------------------------------------------------------|----------------|----------|----------|-----------------------------------|----------------|---------------|----------|-----------------------------------|----------------|-----------|----------|----------------------|----------------|----------------|
|                                                            |                | n        | Baseline | LSMean (mean) change <sup>a</sup> | p <sup>b</sup> | n             | Baseline | LSMean (mean) change <sup>a</sup> | p <sup>b</sup> | n         | Baseline | LSMean (mean) change | p <sup>c</sup> | p <sup>d</sup> |
| ADHDRS-IV-Parent Version:Inv (adjusted for baseline score) |                |          |          |                                   |                |               |          |                                   |                |           |          |                      |                |                |
| Total                                                      | A              | 62       | 37.22    | -18.07*** (-18.87)                | 0.002          | 26            | 13.62    | -5.08** (-4.50)                   | 0.157          | 27        | 35.26    | -16.85*** (-16.59)   | 0.694          | 0.693          |
|                                                            | P              | 58       | 37.57    | -11.77*** (-12.98)                |                | 28            | 14.25    | -1.91 (-2.68)                     |                |           |          |                      |                |                |
| Inattentive                                                | A              | 62       | 22.32    | -10.46*** (-10.64)                | 0.014          | 26            | 9.50     | -3.25* (-2.81)                    | 0.216          | 27        | 21.89    | -10.39*** (-10.33)   | 0.917          | 0.751          |
|                                                            | P              | 58       | 22.52    | -7.39*** (-7.79)                  |                | 28            | 9.82     | -1.22 (-1.86)                     |                |           |          |                      |                |                |
| Hyp/Imp                                                    | A              | 62       | 14.90    | -7.86*** (-8.23)                  | <00.001        | 26            | 4.12     | -2.29** (-1.69)                   | 0.156          | 27        | 13.37    | -6.50*** (-6.26)     | 0.987          | 0.340          |
|                                                            | P              | 58       | 15.05    | -4.60*** (-5.18)                  |                | 28            | 4.43     | -0.74 (-0.82)                     |                |           |          |                      |                |                |
| ADHDRS-IV-Teacher Version (adjusted for baseline score)    |                |          |          |                                   |                |               |          |                                   |                |           |          |                      |                |                |
| Total                                                      | A              | 21       | 24.38    | -7.74** (-7.19)                   | 0.130          | 12            | 14.00    | -3.89 (-3.36)                     | 0.538          | 11        | 22.09    | -3.38 (-3.09)        | 0.302          | 0.510          |
|                                                            | P              | 22       | 24.09    | -3.14 (-2.98)                     |                | 11            | 17.90    | -1.87 (-4.49)                     |                |           |          |                      |                |                |
| Inattentive                                                | A              | 21       | 16.00    | -4.82** (-4.48)                   | 0.051          | 12            | 9.25     | -3.11* (-1.86)                    | 0.231          | 11        | 13.64    | -1.84 (-2.27)        | 0.876          | 0.589          |
|                                                            | P              | 22       | 13.32    | -1.29 (-0.99)                     |                | 11            | 13.18    | -1.10 (-3.68)                     |                |           |          |                      |                |                |
| Hyp/Imp                                                    | A              | 21       | 8.38     | -3.42* (-2.71)                    | 0.265          | 12            | 4.75     | -1.95 (-1.50)                     | 0.386          | 11        | 8.45     | -1.75 (-0.82)        | 0.202          | 0.641          |
|                                                            | P              | 22       | 10.77    | -1.46 (-1.99)                     |                | 11            | 4.72     | -0.16 (-0.81)                     |                |           |          |                      |                |                |
| Life Participation Scale (adjusted for baseline score)     |                |          |          |                                   |                |               |          |                                   |                |           |          |                      |                |                |
| Happy/Social                                               | A              | 58       | 13.55    | 0.09 (0.57)                       | 0.423          | 25            | 16.52    | 0.13 (-0.04)                      | 0.890          | 26        | 12.23    | 1.32 (1.38)          | 0.492          | 0.568          |
|                                                            | P              | 57       | 14.79    | 0.65 (0.53)                       |                | 27            | 16.91    | 0.27 (0.28)                       |                |           |          |                      |                |                |
| Self-Control                                               | A              | 58       | 20.86    | 5.44*** (6.06)                    | 0.366          | 24            | 34.05    | 3.42 (2.62)                       | 0.056          | 25        | 20.43    | 7.38*** (7.49)       | 0.744          | 0.630          |
|                                                            | P              | 57       | 22.22    | 3.97*** (4.29)                    |                | 27            | 34.14    | -0.91 (-1.44)                     |                |           |          |                      |                |                |
| Total                                                      | A              | 58       | 34.42    | 5.49*** (6.51)                    | 0.684          | 24            | 50.67    | 3.50 (2.37)                       | 0.167          | 25        | 32.67    | 8.81*** (9.05)       | 0.752          | 0.510          |
|                                                            | P              | 57       | 37.01    | 4.62*** (4.82)                    |                | 27            | 51.05    | -0.69 (-1.20)                     |                |           |          |                      |                |                |

<sup>a</sup>LSMean values were derived from a model comparing atomoxetine-treated subjects with placebo-treated subjects within the diagnostic group.

<sup>b</sup>Atomoxetine versus placebo *p* value.

<sup>c</sup>ADHD + D (atomoxetine) versus dyslexia-only (atomoxetine) *p* value.

<sup>d</sup>ADHD + D (atomoxetine) versus ADHD-only (atomoxetine) *p* value.

Intra-group *p* values: \**p* < 0.05; \*\**p* < 0.01; \*\*\**p* < 0.001; *p* values from *t* tests on LSMean change.

A, atomoxetine; ADHD, attention-deficit/hyperactivity disorder; ADHD + D, attention-deficit/hyperactivity disorder + dyslexia; ADHDRS, Attention-Deficit/Hyperactivity Disorder (ADHD) Rating Scale; ADHDRS-IV-Parent:Inv, ADHDRS-IV-Parent Version: Investigator-Administered and Scored; LSMean, least-squares mean; P, placebo; T<sub>x</sub>, treatment.
