# Supplementary material
Source: PubMed Central journal article supplement (PMC3842866)
Supplement: Supp_Table3.pdf [file Supp_Table3.pdf]

SUPPLEMENTARY TABLE S3. ACUTE PHASE: LIFE PARTICIPATION SCALE, MULTIDIMENSIONAL SELF CONCEPT SCALE, AND WORKING MEMORY TEST BATTERY FOR CHILDREN

| Measure                                                                | T <sub>x</sub> | ADHD + D       |        |                |                                   | Dyslexia-only                |        |                |                                   | ADHD-only                    |        |                |                      |                |
|------------------------------------------------------------------------|----------------|----------------|--------|----------------|-----------------------------------|------------------------------|--------|----------------|-----------------------------------|------------------------------|--------|----------------|----------------------|----------------|
|                                                                        |                | T <sub>x</sub> | n      | Baseline       | LSMean (mean) change <sup>a</sup> | p <sup>b</sup> (effect size) | n      | Baseline       | LSMean (mean) change <sup>a</sup> | p <sup>b</sup> (effect size) | n      | Baseline       | LSMean (mean) change | p <sup>c</sup> |
| Life Participation Scale (no adjustment for baseline score)            | A              | 58             | 13.55  | 0.53 (0.57)    | 0.888 (0.01)                      | 25                           | 16.52  | -0.06 (-0.04)  | 0.893 (-0.10)                     | 26                           | 12.23  | 1.73* (1.38)   | 0.368                | 0.304          |
|                                                                        | P              | 57             | 14.79  | 0.41 (0.53)    | 0.236 (0.19)                      | 27                           | 16.91  | 0.09 (0.28)    | 0.102 (0.59)                      | 25                           | 20.43  | 7.45*** (7.49) | 0.145                | 0.599          |
| Self-Control                                                           | A              | 58             | 20.86  | 5.41*** (6.06) | 0.361 (0.13)                      | 24                           | 34.05  | 2.75 (2.62)    | 0.257 (0.39)                      | 25                           | 32.67  | 9.22*** (9.05) | 0.131                | 0.414          |
|                                                                        | P              | 57             | 22.22  | 3.28* (4.29)   | 0.476 (0.15)                      | 27                           | 34.14  | -0.96 (-1.44)  | 0.476 (0.15)                      | 25                           | 32.67  | 9.22*** (9.05) | 0.131                | 0.414          |
| Total                                                                  | A              | 58             | 34.42  | 5.81** (6.51)  | 0.476 (0.15)                      | 24                           | 50.67  | 2.60 (2.37)    | 0.476 (0.15)                      | 25                           | 32.67  | 9.22*** (9.05) | 0.131                | 0.414          |
|                                                                        | P              | 57             | 37.01  | 3.64 (4.82)    | 0.476 (0.15)                      | 27                           | 51.05  | -0.89 (-1.20)  | 0.476 (0.15)                      | 25                           | 32.67  | 9.22*** (9.05) | 0.131                | 0.414          |
| Multidimensional Self Concept Scale (adjusted for baseline score)      |                |                |        |                |                                   |                              |        |                |                                   |                              |        |                |                      |                |
| Academic                                                               | A              | 58             | 91.40  | 5.53*** (5.91) | 0.476 (0.15)                      | 23                           | 94.70  | 6.36* (5.30)   | 0.680 (0.06)                      | 25                           | 94.64  | 5.70** (5.52)  | 0.883                | 0.912          |
|                                                                        | P              | 57             | 93.18  | 4.13* (4.23)   | 0.448 (0.12)                      | 24                           | 92.21  | 4.90* (4.71)   | 0.463 (-0.05)                     | 25                           | 101.24 | 3.61 (3.56)    | 0.210                | 0.940          |
| Affect                                                                 | A              | 58             | 100.98 | 3.50* (3.62)   | 0.410 (0.14)                      | 23                           | 105.61 | -1.24 (2.17)   | 0.762 (0.21)                      | 25                           | 93.48  | 4.80* (5.20)   | 0.573                | 0.560          |
|                                                                        | P              | 57             | 102.35 | 2.00 (2.35)    | 0.112 (0.29)                      | 24                           | 101.50 | 1.75 (2.71)    | 0.320 (0.03)                      | 25                           | 97.08  | -1.41 (-1.00)  | 0.663                | 0.483          |
| Competence                                                             | A              | 58             | 94.10  | 6.21*** (6.64) | 0.232 (0.25)                      | 23                           | 97.96  | 2.68 (4.26)    | 0.801 (-0.11)                     | 25                           | 96.76  | 3.60 (3.88)    | 0.384                | 0.650          |
|                                                                        | P              | 57             | 95.26  | 4.47* (4.95)   | 0.321 (0.15)                      | 24                           | 97.96  | 1.59 (2.17)    | 0.379 (-0.08)                     | 25                           | 96.92  | 3.19 (3.44)    | 0.097                | 0.480          |
| Family                                                                 | A              | 57             | 99.98  | 0.23 (0.39)    | 0.237 (0.20)                      | 23                           | 97.87  | -3.19 (0.65)   | 0.286 (0.57)                      | 21                           | 98.00  | 4.87* (2.24)   | 0.545                | 0.908          |
|                                                                        | P              | 57             | 100.39 | -3.38 (-3.12)  | 0.009 (0.68)                      | 24                           | 98.04  | 0.33 (0.38)    | 0.638 (0.03)                      | 12                           | 95.25  | 1.52 (2.17)    | 0.523                | 0.352          |
| Physical                                                               | A              | 58             | 102.33 | 3.27* (4.09)   | 0.251 (0.38)                      | 19                           | 103.91 | -3.70* (-1.17) | 0.559 (0.09)                      | 21                           | 84.81  | 4.16 (3.67)    | 0.228                | 1.00           |
|                                                                        | P              | 57             | 103.21 | 0.80 (1.32)    | 0.251 (0.38)                      | 20                           | 103.50 | 0.28 (-0.17)   | 0.251 (0.38)                      | 23                           | 80.78  | 2.05 (0.65)    |                      |                |
| Social                                                                 | A              | 58             | 98.91  | 4.25** (4.36)  | 0.121 (0.28)                      | 23                           | 101.78 | 1.05 (1.35)    | 0.121 (0.28)                      | 25                           | 96.92  | 3.19 (3.44)    | 0.097                | 0.480          |
|                                                                        | P              | 57             | 99.30  | 2.25 (2.72)    | 0.121 (0.28)                      | 24                           | 99.17  | 2.13 (2.54)    | 0.121 (0.28)                      | 25                           | 96.92  | 3.19 (3.44)    | 0.097                | 0.480          |
| Total                                                                  | A              | 57             | 97.65  | 4.63** (4.72)  | 0.121 (0.28)                      | 23                           | 100.70 | -0.66 (1.61)   | 0.121 (0.28)                      | 25                           | 96.92  | 3.19 (3.44)    | 0.097                | 0.480          |
|                                                                        | P              | 57             | 99.04  | 1.75 (1.98)    | 0.121 (0.28)                      | 24                           | 99.08  | 2.23 (2.29)    | 0.121 (0.28)                      | 25                           | 96.92  | 3.19 (3.44)    | 0.097                | 0.480          |
| Working Memory Test Battery for Children (adjusted for baseline score) |                |                |        |                |                                   |                              |        |                |                                   |                              |        |                |                      |                |
| Phonological Loop                                                      | A              | 51             | 92.76  | 5.31*** (3.57) | 0.237 (0.20)                      | 20                           | 88.30  | 5.53* (7.00)   | 0.286 (0.57)                      | 21                           | 98.00  | 4.87* (2.24)   | 0.545                | 0.908          |
|                                                                        | P              | 54             | 93.04  | 3.07* (1.63)   | 0.009 (0.68)                      | 24                           | 87.50  | 2.08 (2.00)    | 0.638 (0.03)                      | 12                           | 95.25  | 1.52 (2.17)    | 0.523                | 0.352          |
| Central Executive component score                                      | A              | 41             | 89.00  | 6.32* (7.34)   | 0.251 (0.38)                      | 19                           | 92.59  | 4.72 (6.65)    | 0.559 (0.09)                      | 21                           | 84.81  | 4.16 (3.67)    | 0.228                | 1.00           |
|                                                                        | P              | 44             | 91.91  | -1.21 (-0.89)  | 0.251 (0.38)                      | 20                           | 83.10  | -1.09 (1.80)   | 0.251 (0.38)                      | 23                           | 80.78  | 2.05 (0.65)    |                      |                |
| Visuospatial Sketchpad Component score                                 | A              | 47             | 83.79  | 3.52 (4.15)    | 0.251 (0.38)                      | 20                           | 83.10  | -1.09 (1.80)   | 0.251 (0.38)                      | 23                           | 80.78  | 2.05 (0.65)    |                      |                |
|                                                                        | P              | 43             | 84.02  | 0.15 (-0.47)   | 0.251 (0.38)                      | 23                           | 80.78  | 2.05 (0.65)    | 0.251 (0.38)                      | 23                           | 80.78  | 2.05 (0.65)    |                      |                |

<sup>a</sup>LSMean values were derived from a model comparing atomoxetine-treated subjects with placebo-treated subjects within the diagnostic group.

<sup>b</sup>Atomoxetine versus placebo *p* value.

<sup>c</sup>ADHD + D (atomoxetine) versus dyslexia-only (atomoxetine) *p* value.

<sup>d</sup>ADHD + D (atomoxetine) versus ADHD-only (atomoxetine) *p* value.

Intra-group *p* values: \**p* < 0.05; \*\**p* < 0.01; \*\*\**p* < 0.001; *p* values from *t* tests on LSMean change.

A, atomoxetine; ADHD, attention-deficit/hyperactivity disorder; ADHD + D, attention deficit disorder + dyslexia; K-SCT, Kiddie Sluggish Cognitive Tempo Interview; LSMean, least-squares mean; P, placebo; T<sub>x</sub>, treatment.
