# Supplementary material
Source: PubMed Central journal article supplement (PMC3842866)
Supplement: Supp_Table4.pdf [file Supp_Table4.pdf]

SUPPLEMENTARY TABLE S4. ACUTE PHASE: PEARSON'S CORRELATION COEFFICIENTS BETWEEN  
K-SCT INTERVIEW AND ADHDRS-IV SCORES

|                                                                                             | n   | <i>Pearson's correlation coefficient</i> | <i>p value</i> |
|---------------------------------------------------------------------------------------------|-----|------------------------------------------|----------------|
| All subjects correlation coefficient between K-SCT Parent Total score and...                |     |                                          |                |
| ADHDRS-Parent:Inv Inattentive score                                                         | 188 | 0.53                                     | < .001         |
| ADHDRS-Parent:Inv Hyperactive/Impulsive score                                               | 188 | 0.40                                     | < .001         |
| ADHDRS-Parent:Inv Total score                                                               | 188 | 0.54                                     | < .001         |
| ADHDRS-IV-Teacher Version Inattentive score                                                 | 77  | 0.05                                     | .636           |
| ADHDRS-IV-Teacher Version Hyperactive/Impulsive score                                       | 77  | -0.18                                    | .108           |
| ADHDRS-IV-Teacher Version Total score                                                       | 77  | -0.07                                    | .540           |
| All subjects correlation coefficient between K-SCT Interview Teacher Total score and...     |     |                                          |                |
| ADHDRS-Parent:Inv Inattentive score                                                         | 78  | 0.24                                     | 0.037          |
| ADHDRS-Parent:Inv Hyperactive/Impulsive score                                               | 78  | 0.17                                     | 0.141          |
| ADHDRS-Parent:Inv Total score                                                               | 78  | 0.24                                     | 0.033          |
| ADHDRS-IV-Teacher Version Inattentive score                                                 | 76  | 0.61                                     | <0.001         |
| ADHDRS-IV-Teacher Version Hyperactive/Impulsive score                                       | 76  | 0.33                                     | 0.004          |
| ADHDRS-IV-Teacher Version Total score                                                       | 76  | 0.56                                     | <0.001         |
| All subjects correlation coefficient between K-SCT Youth Total score and...                 |     |                                          |                |
| ADHDRS-Parent:Inv Inattentive score                                                         | 187 | 0.17                                     | 0.021          |
| ADHDRS-Parent:Inv Hyperactive/Impulsive score                                               | 187 | 0.16                                     | 0.032          |
| ADHDRS-Parent:Inv Total score                                                               | 187 | 0.19                                     | 0.010          |
| ADHDRS-IV-Teacher Version Inattentive score                                                 | 77  | -0.02                                    | 0.834          |
| ADHDRS-IV-Teacher Version Hyperactive/Impulsive score                                       | 77  | -0.15                                    | 0.199          |
| ADHDRS-IV-Teacher Version Total score                                                       | 77  | -0.10                                    | 0.394          |
| ADHD + D subjects correlation coefficient between K-SCT Interview Parent Total score and... |     |                                          |                |
| ADHDRS-Parent:Inv Inattentive score                                                         | 113 | 0.59                                     | <0.001         |
| ADHDRS-Parent:Inv Hyperactive/Impulsive score                                               | 113 | 0.36                                     | <0.001         |
| ADHDRS-Parent:Inv Total score                                                               | 113 | 0.55                                     | <0.001         |
| ADHDRS-IV-Teacher Version Inattentive score                                                 | 43  | 0.07                                     | 0.662          |
| ADHDRS-IV-Teacher Version Hyperactive/Impulsive score                                       | 43  | -0.35                                    | 0.020          |
| ADHDRS-IV-Teacher Version Total score                                                       | 43  | -0.16                                    | 0.293          |
| ADHD + D subjects correlation coefficient between K-SCT Teacher Total score and...          |     |                                          |                |
| ADHDRS-Parent:Inv Inattentive score                                                         | 44  | 0.07                                     | 0.661          |
| ADHDRS-Parent:Inv Hyperactive/Impulsive score                                               | 44  | 0.06                                     | 0.717          |
| ADHDRS-Parent:Inv Total score                                                               | 44  | 0.07                                     | 0.639          |
| ADHDRS-IV-Teacher Version Inattentive score                                                 | 43  | 0.61                                     | <0.001         |
| ADHDRS-IV-Teacher Version Hyperactive/Impulsive score                                       | 43  | 0.24                                     | 0.119          |
| ADHDRS-IV-Teacher Version Total score                                                       | 43  | 0.50                                     | <0.001         |
| ADHD + D subjects correlation coefficient between K-SCT Youth Total score and...            |     |                                          |                |
| ADHDRS-Parent:Inv Inattentive score                                                         | 113 | 0.20                                     | 0.034          |
| ADHDRS-Parent:Inv Hyperactive/Impulsive score                                               | 113 | 0.06                                     | 0.557          |
| ADHDRS-Parent:Inv Total score                                                               | 113 | 0.15                                     | 0.105          |
| ADHDRS-IV-Teacher Version Inattentive score                                                 | 43  | 0.16                                     | 0.313          |
| ADHDRS-IV-Teacher Version Hyperactive/Impulsive score                                       | 43  | -0.14                                    | 0.383          |
| ADHDRS-IV-Teacher Version Total score                                                       | 43  | 0.01                                     | 0.930          |
| ADHD-only subjects correlation coefficient between K-SCT Parent Total score and...          |     |                                          |                |
| ADHDRS-Parent:Inv Inattentive score                                                         | 23  | 0.40                                     | 0.060          |
| ADHDRS-Parent:Inv Hyperactive/Impulsive score                                               | 23  | 0.14                                     | 0.519          |
| ADHDRS-Parent:Inv Total score                                                               | 23  | 0.36                                     | 0.089          |
| ADHDRS-IV-Teacher Version Inattentive score                                                 | 11  | 0.24                                     | 0.489          |
| ADHDRS-IV-Teacher Version Hyperactive/Impulsive score                                       | 11  | -0.01                                    | 0.984          |
| ADHDRS-IV-Teacher Version Total score                                                       | 11  | 0.13                                     | 0.706          |
| ADHD-only subjects correlation coefficient between K-SCT Teacher Total score and...         |     |                                          |                |
| ADHDRS-Parent:Inv Inattentive score                                                         | 11  | 0.62                                     | 0.041          |
| ADHDRS-Parent:Inv Hyperactive/Impulsive score                                               | 11  | 0.52                                     | 0.103          |
| ADHDRS-Parent:Inv Total score                                                               | 11  | 0.68                                     | 0.019          |
| ADHDRS-IV-Teacher Version Inattentive score                                                 | 11  | 0.77                                     | 0.004          |
| ADHDRS-IV-Teacher Version Hyperactive/Impulsive score                                       | 11  | 0.50                                     | 0.120          |
| ADHDRS-IV-Teacher Version Total score                                                       | 11  | 0.70                                     | 0.013          |
| ADHD-only subjects correlation coefficient between K-SCT Youth Total score and...           |     |                                          |                |
| ADHDRS-Parent:Inv Inattentive score                                                         | 23  | -0.07                                    | 0.759          |
| ADHDRS-Parent:Inv Hyperactive/Impulsive score                                               | 23  | 0.00                                     | 0.994          |
| ADHDRS-Parent:Inv Total score                                                               | 23  | -0.05                                    | 0.817          |
| ADHDRS-IV-Teacher Version Inattentive score                                                 | 11  | -0.28                                    | 0.419          |

*(continued)*

SUPPLEMENTARY TABLE S4. (CONTINUED)

|                                                                                         | n  | <i>Pearson's correlation coefficient</i> | <i>p value</i> |
|-----------------------------------------------------------------------------------------|----|------------------------------------------|----------------|
| ADHDRS-IV-Teacher Version Hyperactive/Impulsive score                                   | 11 | -0.31                                    | 0.368          |
| ADHDRS-IV-Teacher Version Total score                                                   | 11 | -0.32                                    | 0.344          |
| Dyslexia-only subjects correlation coefficient between K-SCT Parent Total score and...  |    |                                          |                |
| ADHDRS-Parent:Inv Inattentive score                                                     | 52 | 0.19                                     | 0.184          |
| ADHDRS-Parent:Inv Hyperactive/Impulsive score                                           | 52 | 0.41                                     | 0.002          |
| ADHDRS-Parent:Inv Total score                                                           | 52 | 0.35                                     | 0.010          |
| ADHDRS-IV-Teacher Version Inattentive score                                             | 23 | -0.12                                    | 0.577          |
| ADHDRS-IV-Teacher Version Hyperactive/Impulsive score                                   | 23 | 0.41                                     | 0.050          |
| ADHDRS-IV-Teacher Version Total score                                                   | 23 | 0.10                                     | 0.643          |
| Dyslexia-only subjects correlation coefficient between K-SCT Teacher Total score and... |    |                                          |                |
| ADHDRS-Parent:Inv Inattentive score                                                     | 23 | 0.35                                     | 0.098          |
| ADHDRS-Parent:Inv Hyperactive/Impulsive score                                           | 23 | 0.18                                     | 0.418          |
| ADHDRS-Parent:Inv Total score                                                           | 23 | 0.39                                     | 0.064          |
| ADHDRS-IV-Teacher Version Inattentive score                                             | 22 | 0.48                                     | 0.022          |
| ADHDRS-IV-Teacher Version Hyperactive/Impulsive score                                   | 22 | 0.60                                     | 0.003          |
| ADHDRS-IV-Teacher Version Total score                                                   | 22 | 0.66                                     | <0.001         |
| Dyslexia-only subjects correlation coefficient between K-SCT Youth Total score and...   |    |                                          |                |
| ADHDRS-Parent:Inv Inattentive score                                                     | 51 | -0.07                                    | 0.614          |
| ADHDRS-Parent:Inv Hyperactive/Impulsive score                                           | 51 | 0.38                                     | 0.006          |
| ADHDRS-Parent:Inv Total score                                                           | 51 | 0.13                                     | 0.352          |
| ADHDRS-IV-Teacher Version Inattentive score                                             | 23 | -0.40                                    | 0.058          |
| ADHDRS-IV-Teacher Version Hyperactive/Impulsive score                                   | 23 | 0.01                                     | 0.971          |
| ADHDRS-IV-Teacher Version Total score                                                   | 23 | -0.30                                    | 0.161          |

ADHD, attention-deficit/hyperactivity disorder; ADHD+D, attention-deficit/hyperactivity disorder+dyslexia; ADHDRS, Attention-Deficit/Hyperactivity Disorder (ADHD) Rating Scale; ADHDRS-IV-Parent:Inv, ADHDRS-IV-Parent Version: Investigator-Administered and Scored; K-SCT, Kiddie Sluggish Cognitive Tempo Interview.
