# Supplementary material
Source: PubMed Central journal article supplement (PMC3842866)
Supplement: Supp_Table5.pdf [file Supp_Table5.pdf]

SUPPLEMENTARY TABLE S5. EXTENSION PHASE: LIFE PARTICIPATION SCALE, MULTIDIMENSIONAL SELF CONCEPT SCALE, AND WORKING MEMORY TEST BATTERY FOR CHILDREN

| Measure                                                                     | ADHD+D |          |                      | Dyslexia-only |          |                      | ADHD-only |          |                      | p <sup>a</sup> | p <sup>b</sup> |
|-----------------------------------------------------------------------------|--------|----------|----------------------|---------------|----------|----------------------|-----------|----------|----------------------|----------------|----------------|
|                                                                             | n      | Baseline | LSMean (mean) change | n             | Baseline | LSMean (mean) change | n         | Baseline | LSMean (mean) change |                |                |
| Life Participation Scale (no adjustment for baseline score)                 |        |          |                      |               |          |                      |           |          |                      |                |                |
| Happy/Social                                                                | 45     | 13.25    | 1.81* (1.57)         | 18            | 17.17    | 0.19 (0.72)          | 21        | 12.57    | 2.16 (2.14)          | 0.185          | 0.781          |
| Self-Control                                                                | 45     | 20.82    | 9.83*** (9.10)       | 17            | 34.48    | 4.08 (4.40)          | 20        | 21.01    | 10.52*** (10.44)     | 0.094          | 0.831          |
| Total                                                                       | 45     | 34.07    | 11.65*** (10.67)     | 17            | 51.83    | 3.85 (4.81)          | 20        | 33.61    | 12.68** (12.64)      | 0.073          | 0.812          |
| Multidimensional Self Concept Scale (no adjustment for baseline score)      |        |          |                      |               |          |                      |           |          |                      |                |                |
| Academic                                                                    | 45     | 91.20    | 6.16*** (6.02)       | 18            | 94.17    | 5.53 (4.89)          | 21        | 94.67    | 6.24* (5.43)         | 0.905          | 0.976          |
| Affect                                                                      | 45     | 100.27   | 4.34* (4.29)         | 18            | 106.39   | 3.51 (1.78)          | 21        | 101.90   | 3.69 (3.14)          | 0.960          | 0.837          |
| Competence                                                                  | 45     | 93.84    | 6.50*** (6.76)       | 18            | 99.44    | 4.05 (4.06)          | 21        | 94.62    | 5.43* (5.19)         | 0.642          | 0.706          |
| Family                                                                      | 44     | 98.41    | 0.82 (0.16)          | 18            | 98.67    | -3.68 (-4.61)        | 21        | 95.43    | -0.54 (0.33)         | 0.381          | 0.706          |
| Physical                                                                    | 45     | 98.93    | 4.97* (6.09)         | 18            | 105.33   | 1.03 (-1.44)         | 21        | 99.76    | 1.44 (2.43)          | 0.432          | 0.258          |
| Social                                                                      | 45     | 97.58    | 5.48** (4.84)        | 18            | 103.78   | 2.27 (0.06)          | 21        | 99.43    | 3.69 (2.38)          | 0.564          | 0.584          |
| Total                                                                       | 44     | 96.02    | 5.62** (5.61)        | 18            | 101.83   | 1.72 (0.28)          | 21        | 97.48    | 3.51 (3.48)          | 0.413          | 0.465          |
| Working Memory Test Battery for Children (no adjustment for baseline score) |        |          |                      |               |          |                      |           |          |                      |                |                |
| Phonological Loop Component score                                           | 43     | 92.40    | 4.07* (3.67)         | 17            | 88.29    | 6.91* (7.53)         | 20        | 100.10   | 2.39 (1.70)          | 0.463          | 0.572          |
| Central Executive Component score                                           | 38     | 90.16    | 3.88 (6.53)          | 15            | 92.13    | 9.89** (8.73)        | 14        | 93.86    | 3.37 (1.64)          | 0.240          | 0.881          |
| Visuospatial Sketchpad Component Score                                      | 40     | 83.95    | 3.45 (3.85)          | 17            | 84.12    | -3.11 (1.47)         | 20        | 85.80    | 2.92 (2.65)          | 0.209          | 0.883          |

<sup>a</sup>ADHD+D (atomoxetine) versus dyslexia-only (atomoxetine) *p* value.

<sup>b</sup>ADHD+D (atomoxetine) versus ADHD-only (atomoxetine) *p* value.

Intra-group *p* values: \**p*<0.05; \*\**p*<0.01; \*\*\**p*<0.001; *p* values from *t* tests on LSMean change.

ADHD, attention-deficit/hyperactivity disorder; ADHD+D, attention-deficit/hyperactivity disorder + dyslexia; ADHDRS, Attention-Deficit/Hyperactivity Disorder (ADHD) Rating Scale; ADHDRS-IV-Parent:Inv, ADHDRS-IV-Parent Version: Investigator-Administered and Scored; K-SCT, Kiddie Sluggish Cognitive Tempo Interview; LSMean, Least-squares mean.
