# Supplementary material
Source: PubMed Central journal article supplement (PMC3842866)
Supplement: Supp_Table6.pdf [file Supp_Table6.pdf]

SUPPLEMENTARY TABLE S6. EXTENSION PHASE: LIFE PARTICIPATION SCALE

| Measure                                                | ADHD+D |          |                                   | Dyslexia-only |          |                                   | ADHD-only |          |                      | p <sup>a</sup> | p <sup>b</sup> |
|--------------------------------------------------------|--------|----------|-----------------------------------|---------------|----------|-----------------------------------|-----------|----------|----------------------|----------------|----------------|
|                                                        | n      | Baseline | LSMean (mean) change <sup>a</sup> | n             | Baseline | LSMean (mean) change <sup>a</sup> | n         | Baseline | LSMean (mean) change |                |                |
| Life Participation Scale (adjusted for baseline score) |        |          |                                   |               |          |                                   |           |          |                      |                |                |
| Happy/Social                                           | 45     | 13.25    | 1.88* (1.57)                      | 18            | 17.17    | 2.99 (0.72)                       | 21        | 12.57    | 1.92 (2.14)          | 0.370          | 0.974          |
| Self-Control                                           | 45     | 20.82    | 9.76*** (9.10)                    | 17            | 34.48    | 8.80* (4.40)                      | 20        | 21.01    | 10.38*** (10.44)     | 0.786          | 0.832          |
| Total                                                  | 45     | 34.07    | 11.69*** (10.67)                  | 17            | 51.83    | 10.64* (4.81)                     | 20        | 33.61    | 12.22** (12.64)      | 0.848          | 0.895          |

<sup>a</sup>ADHD+D (atomoxetine) versus dyslexia-only (atomoxetine) *p* value.

<sup>b</sup>ADHD+D (atomoxetine) versus ADHD-only (atomoxetine) *p* value.

Intra-group *p* values: \**p*<0.05; \*\**p*<0.01; \*\*\**p*<0.001; *p* values from *t* tests on LSMean change.

ADHD, attention-deficit/hyperactivity disorder; ADHD+D, attention-deficit/hyperactivity disorder+dyslexia; ADHDRS, Attention-Deficit/Hyperactivity Disorder (ADHD) Rating Scale; ADHDRS-IV-Parent:Inv, ADHDRS-IV-Parent Version: Investigator-Administered and Scored; LSMean, Least-squares mean.
