# Supplementary material
Source: PubMed Central journal article supplement (PMC3842866)
Supplement: Supp_Table7.pdf [file Supp_Table7.pdf]

SUPPLEMENTARY TABLE S7. EXTENSION PHASE: PEARSON'S CORRELATION COEFFICIENTS BETWEEN K-SCT SCORES AND ADHDRS-IV SCORES

|                                                                                     | n   | <i>Pearson's correlation coefficient</i> | <i>p value</i> |
|-------------------------------------------------------------------------------------|-----|------------------------------------------|----------------|
| All subjects correlation coefficient between K-SCT Parent Total score and...        |     |                                          |                |
| ADHDRS-Parent:Inv Inattentive score                                                 | 144 | 0.62                                     | <0.001         |
| ADHDRS-Parent:Inv Hyperactive/Impulsive score                                       | 144 | 0.48                                     | <0.001         |
| ADHDRS-Parent:Inv Total score                                                       | 144 | 0.63                                     | <0.001         |
| ADHDRS-IV-Teacher Version Inattentive score                                         | 40  | 0.06                                     | 0.716          |
| ADHDRS-IV-Teacher Version Hyperactive/Impulsive score                               | 40  | -0.14                                    | 0.399          |
| ADHDRS-IV-Teacher Version Total score                                               | 40  | -0.04                                    | 0.826          |
| All subjects correlation coefficient between K-SCT Teacher Total score and...       |     |                                          |                |
| ADHDRS-Parent:Inv Inattentive score                                                 | 40  | 0.08                                     | .640           |
| ADHDRS-Parent:Inv Hyperactive/Impulsive score                                       | 40  | 0.17                                     | .289           |
| ADHDRS-Parent:Inv Total score                                                       | 40  | 0.14                                     | .391           |
| ADHDRS-IV-Teacher Version Inattentive score                                         | 40  | 0.71                                     | <.001          |
| ADHDRS-IV-Teacher Version Hyperactive/Impulsive score                               | 40  | 0.46                                     | .003           |
| ADHDRS-IV-Teacher Version Total score                                               | 40  | 0.64                                     | <.001          |
| All subjects correlation coefficient between K-SCT Youth Total score and...         |     |                                          |                |
| ADHDRS-Parent:Inv Inattentive score                                                 | 145 | 0.24                                     | 0.003          |
| ADHDRS-Parent:Inv Hyperactive/Impulsive score                                       | 145 | 0.09                                     | 0.275          |
| ADHDRS-Parent:Inv Total score                                                       | 145 | 0.20                                     | 0.016          |
| ADHDRS-IV-Teacher Version Inattentive score                                         | 40  | 0.05                                     | 0.750          |
| ADHDRS-IV-Teacher Version Hyperactive/Impulsive score                               | 40  | -0.13                                    | 0.417          |
| ADHDRS-IV-Teacher Version Total score                                               | 40  | -0.04                                    | 0.819          |
| ADHD + D subjects correlation coefficient between K-SCT Parent Total score and...   |     |                                          |                |
| ADHDRS-Parent:Inv Inattentive score                                                 | 88  | 0.63                                     | <0.001         |
| ADHDRS-Parent:Inv Hyperactive/Impulsive score                                       | 88  | 0.49                                     | <0.001         |
| ADHDRS-Parent:Inv Total score                                                       | 88  | 0.64                                     | <0.001         |
| ADHDRS-IV-Teacher Version Inattentive score                                         | 25  | 0.13                                     | 0.534          |
| ADHDRS-IV-Teacher Version Hyperactive/Impulsive score                               | 25  | -0.08                                    | 0.689          |
| ADHDRS-IV-Teacher Version Total score                                               | 25  | 0.03                                     | 0.886          |
| ADHD + D subjects correlation coefficient between K-SCT Teacher Total score and...  |     |                                          |                |
| ADHDRS-Parent:Inv Inattentive score                                                 | 25  | 0.06                                     | 0.764          |
| ADHDRS-Parent:Inv Hyperactive/Impulsive score                                       | 25  | 0.34                                     | 0.098          |
| ADHDRS-Parent:Inv Total score                                                       | 25  | 0.23                                     | 0.277          |
| ADHDRS-IV-Teacher Version Inattentive score                                         | 25  | 0.70                                     | <0.001         |
| ADHDRS-IV-Teacher Version Hyperactive/Impulsive score                               | 25  | 0.52                                     | 0.007          |
| ADHDRS-IV-Teacher Version Total score                                               | 25  | 0.67                                     | <0.001         |
| ADHD + D subjects correlation coefficient between K-SCT Youth Total score and...    |     |                                          |                |
| ADHDRS-Parent:Inv Inattentive Score                                                 | 89  | 0.22                                     | 0.040          |
| ADHDRS-Parent:Inv Hyperactive/Impulsive Score                                       | 89  | -0.00                                    | 0.975          |
| ADHDRS-Parent:Inv Total Score                                                       | 89  | 0.13                                     | 0.222          |
| ADHDRS-IV-Teacher Version Inattentive Score                                         | 25  | 0.10                                     | 0.623          |
| ADHDRS-IV-Teacher Version Hyperactive/Impulsive score                               | 25  | -0.10                                    | 0.624          |
| ADHDRS-IV-Teacher Version Total Score                                               | 25  | 0.01                                     | 0.981          |
| ADHD-only subjects correlation coefficient between K-SCT Parent Total score and...  |     |                                          |                |
| ADHDRS-Parent:Inv Inattentive score                                                 | 19  | 0.73                                     | <0.001         |
| ADHDRS-Parent:Inv Hyperactive/Impulsive score                                       | 19  | 0.36                                     | 0.126          |
| ADHDRS-Parent:Inv Total score                                                       | 19  | 0.65                                     | 0.002          |
| ADHDRS-IV-Teacher Version Inattentive score                                         | 5   | 0.08                                     | 0.906          |
| ADHDRS-IV-Teacher Version Hyperactive/Impulsive score                               | 5   | -0.15                                    | 0.829          |
| ADHDRS-IV-Teacher Version Total score                                               | 5   | -0.07                                    | 0.922          |
| ADHD-only subjects correlation coefficient between K-SCT Teacher Total score and... |     |                                          |                |
| ADHDRS-Parent:Inv Inattentive score                                                 | 5   | -0.44                                    | 0.508          |
| ADHDRS-Parent:Inv Hyperactive/Impulsive score                                       | 5   | -0.39                                    | 0.561          |
| ADHDRS-Parent:Inv Total score                                                       | 5   | -0.46                                    | 0.483          |
| ADHDRS-IV-Teacher Version Inattentive score                                         | 5   | 0.48                                     | 0.458          |
| ADHDRS-IV-Teacher Version Hyperactive/Impulsive score                               | 5   | 0.49                                     | 0.451          |
| ADHDRS-IV-Teacher Version Total score                                               | 5   | 0.58                                     | 0.352          |
| ADHD-only subjects correlation coefficient between K-SCT Youth Total score and...   |     |                                          |                |
| ADHDRS-Parent:Inv Inattentive score                                                 | 19  | 0.43                                     | 0.068          |
| ADHDRS-Parent:Inv Hyperactive/Impulsive score                                       | 19  | 0.42                                     | 0.072          |
| ADHDRS-Parent:Inv Total score                                                       | 19  | 0.47                                     | 0.042          |
| ADHDRS-IV-Teacher Version Inattentive score                                         | 5   | -0.06                                    | 0.927          |

(continued)

SUPPLEMENTARY TABLE S7. (CONTINUED)

|                                                                                         | n  | <i>Pearson's correlation coefficient</i> | <i>p value</i> |
|-----------------------------------------------------------------------------------------|----|------------------------------------------|----------------|
| ADHDRS-IV-Teacher Version Hyperactive/Impulsive score                                   | 5  | -0.77                                    | 0.147          |
| ADHDRS-IV-Teacher Version Total score                                                   | 5  | -0.58                                    | 0.345          |
| Dyslexia-only subjects correlation coefficient between K-SCT Parent Total score and...  |    |                                          |                |
| ADHDRS-Parent:Inv Inattentive score                                                     | 37 | 0.50                                     | 0.001          |
| ADHDRS-Parent:Inv Hyperactive/Impulsive score                                           | 37 | 0.40                                     | 0.012          |
| ADHDRS-Parent:Inv Total score                                                           | 37 | 0.55                                     | <0.001         |
| ADHDRS-IV-Teacher Version Inattentive score                                             | 10 | 0.01                                     | 0.975          |
| ADHDRS-IV-Teacher Version Hyperactive/Impulsive score                                   | 10 | -0.22                                    | 0.553          |
| ADHDRS-IV-Teacher Version Total Score                                                   | 10 | -0.10                                    | 0.791          |
| Dyslexia-only subjects correlation coefficient between K-SCT Teacher Total score and... |    |                                          |                |
| ADHDRS-Parent:Inv Inattentive score                                                     | 10 | 0.19                                     | 0.615          |
| ADHDRS-Parent:Inv Hyperactive/Impulsive score                                           | 10 | -0.21                                    | 0.576          |
| ADHDRS-Parent:Inv Total score                                                           | 10 | 0.11                                     | 0.777          |
| ADHDRS-IV-Teacher Version Inattentive score                                             | 10 | 0.84                                     | 0.001          |
| ADHDRS-IV-Teacher Version Hyperactive/Impulsive score                                   | 10 | 0.31                                     | 0.390          |
| ADHDRS-IV-Teacher Version Total score                                                   | 10 | 0.67                                     | 0.034          |
| Dyslexia-only subjects correlation coefficient between K-SCT Youth Total score and...   |    |                                          |                |
| ADHDRS-Parent:Inv Inattentive score                                                     | 37 | 0.25                                     | 0.134          |
| ADHDRS-Parent:Inv Hyperactive/Impulsive score                                           | 37 | 0.41                                     | 0.012          |
| ADHDRS-Parent:Inv Total score                                                           | 37 | 0.36                                     | 0.027          |
| ADHDRS-IV-Teacher Version Inattentive score                                             | 10 | -0.23                                    | 0.543          |
| ADHDRS-IV-Teacher Version Hyperactive/Impulsive score                                   | 10 | -0.08                                    | 0.823          |
| ADHDRS-IV-Teacher Version Total score                                                   | 10 | -0.18                                    | 0.633          |

ADHD, attention-deficit/hyperactivity disorder; ADHD+D, attention-deficit/hyperactivity disorder+dyslexia; ADHDRS, Attention-Deficit/Hyperactivity Disorder (ADHD) Rating Scale; ADHDRS-IV-Parent:Inv, ADHD Rating Scale-IV-Parent Version: Investigator-Administered and Scored; K-SCT, Kiddie Sluggish Cognitive Tempo Interview.
